# Supplementary material for: Should home-based ovulation predictor kits be offered as an additional approach for fertility management for women and couples desiring pregnancy? A systematic review and meta-analysis
Source: PubMed Central journal article supplement — BMJ Glob Health. 2019 Apr 25;4(2):e001403. doi: 10.1136/bmjgh-2019-001403 (PMC6509595; doi:10.1136/bmjgh-2019-001403), 2019-04-25
Supplement: bmjgh-2019-001403supp001.pdf [file bmjgh-2019-001403supp001.pdf]

## Online Supplementary File 1: Home-based ovulation predictor kits

### PubMed search strategy, adapted for CINAHL, LILACS, and EMBASE:

“ovulation predictor kit” [tiab] OR “ovulation prediction” [tiab] OR “ovulation testing” [tiab] OR “ovulation test” [tiab] OR “LH surge test” [tiab] OR “luteinizing hormone surge test” [tiab])

OR

((ovulation[tiab] OR ovulate[tiab] OR ovulatory[tiab] OR "menstrual cycle"[tiab] or "fertile window"[tiab] OR fertile[tiab] OR fertility[tiab] OR infertility[tiab] OR "LH surge"[tiab] OR "luteinizing hormone surge"[tiab] OR "luteal phase"[tiab]) AND ("prediction kit"[tiab] OR "predictor kit"[tiab] OR "ultrasound assessment"[tiab] OR "self-test"[tiab] OR "self-testing"[tiab] OR "home-based test"[tiab] OR "home-based testing"[tiab] OR "home test"[tiab] OR "home testing"[tiab] OR "community-based test"[tiab] OR "pharmacy-based test"[tiab] OR "self-administer"[tiab] OR "self-sampled"[tiab] OR "self-sample"[tiab] OR "self-sampling"[tiab] OR "self-collecting"[tiab] OR "self-collected"[tiab] OR "self-collection"[tiab] OR "self- versus provider-collected"[tiab] OR "self- and provider-collected"[tiab] OR "self- versus physician-collected"[tiab] OR "self- and physician-collected"[tiab] OR "self-administration" [Mesh] OR "self-assessment" [Mesh]))
